# Supplementary material
Source: PubMed Central journal article supplement (PMC4789092)
Supplement: NIHMS758788-supplement-4.pdf [file NIHMS758788-supplement-4.pdf]

**A**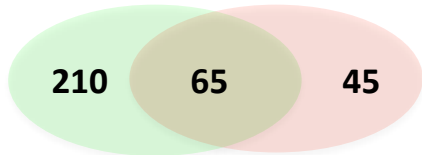

275 Full Text  
Articles Curated

Articles Associated with  
MIBiG Fungal Entries

**B**

With full core  
enzyme sequences

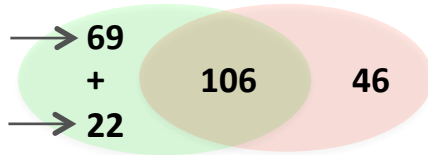

Without full core  
enzyme sequences

Compounds Curated

Compounds in  
MIBiG Fungal Entries
