# Supplementary material
Source: PubMed Central journal article supplement (PMC4789092)

4 Entry Types

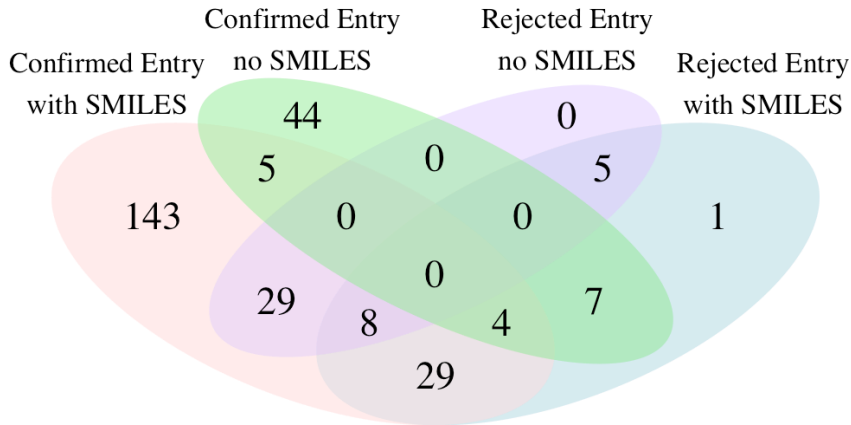

608 Unique Entries  
(Article-SMILES pairs)

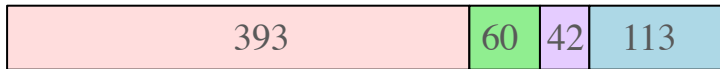

Supplement: NIHMS758788-supplement-1.pdf [file NIHMS758788-supplement-1.pdf]

A

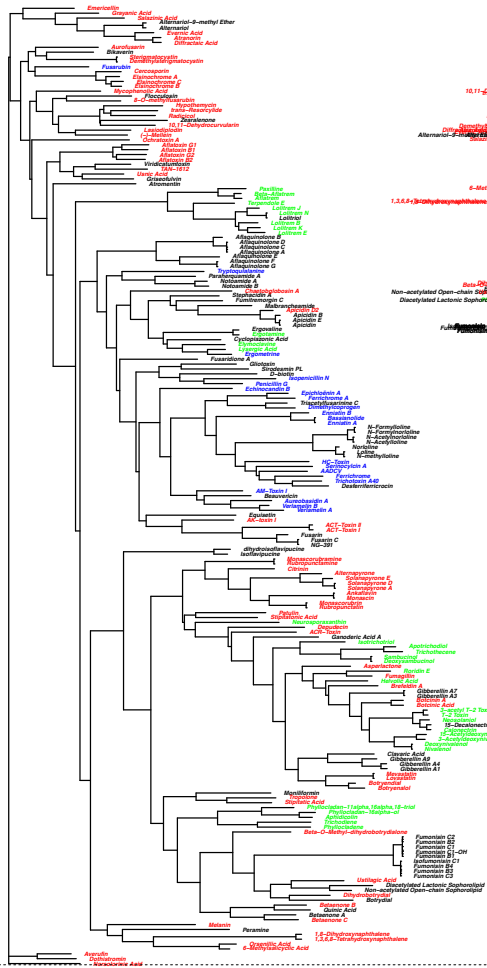

B

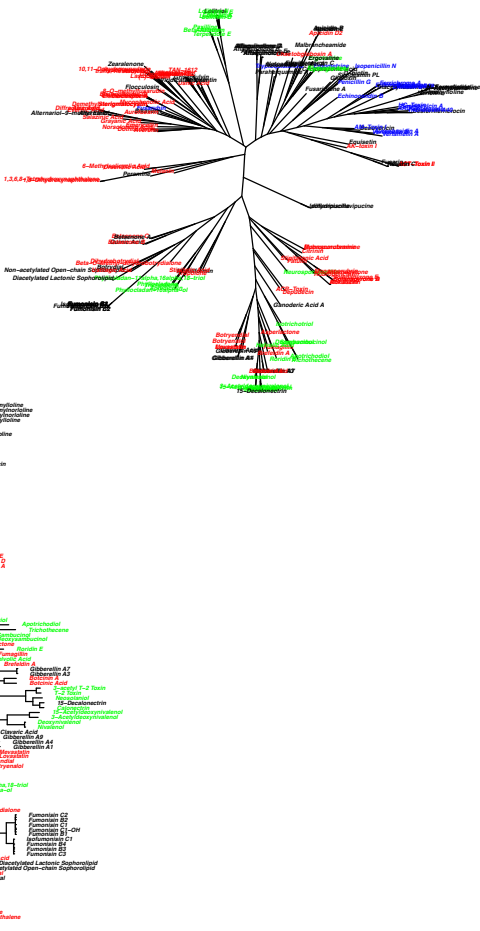

Supplement: NIHMS758788-supplement-2.pdf [file NIHMS758788-supplement-2.pdf]

A. Condensation domain

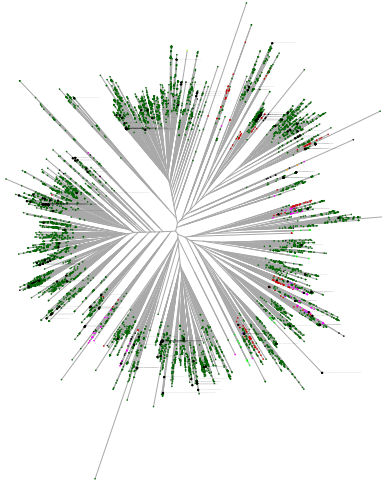

B. DMATS

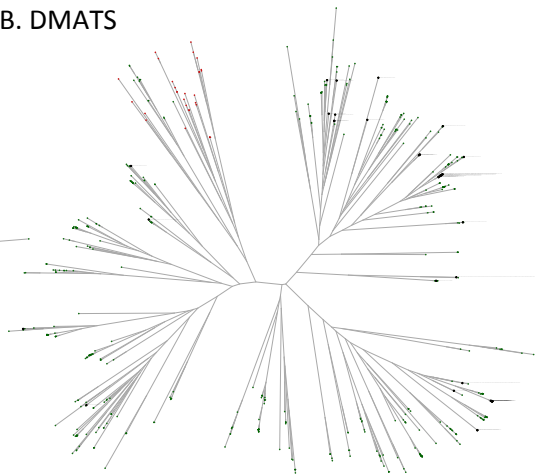

C. GGPPS

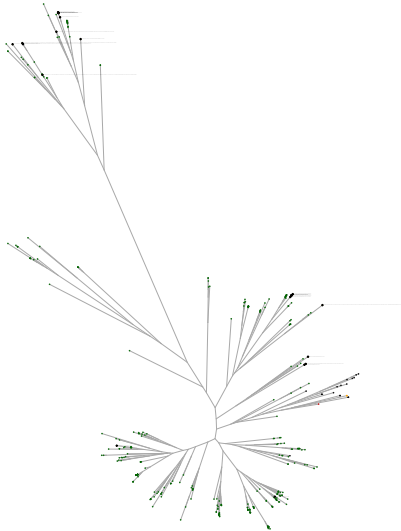

D. Trichodiene synthase

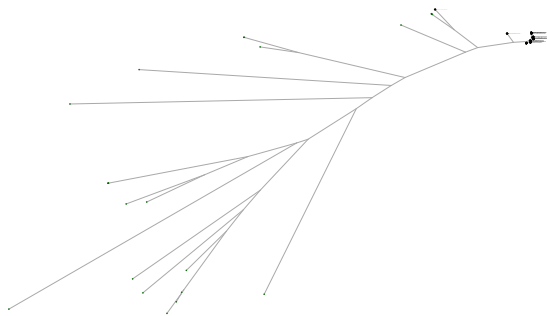

Supplement: NIHMS758788-supplement-3.pdf [file NIHMS758788-supplement-3.pdf]

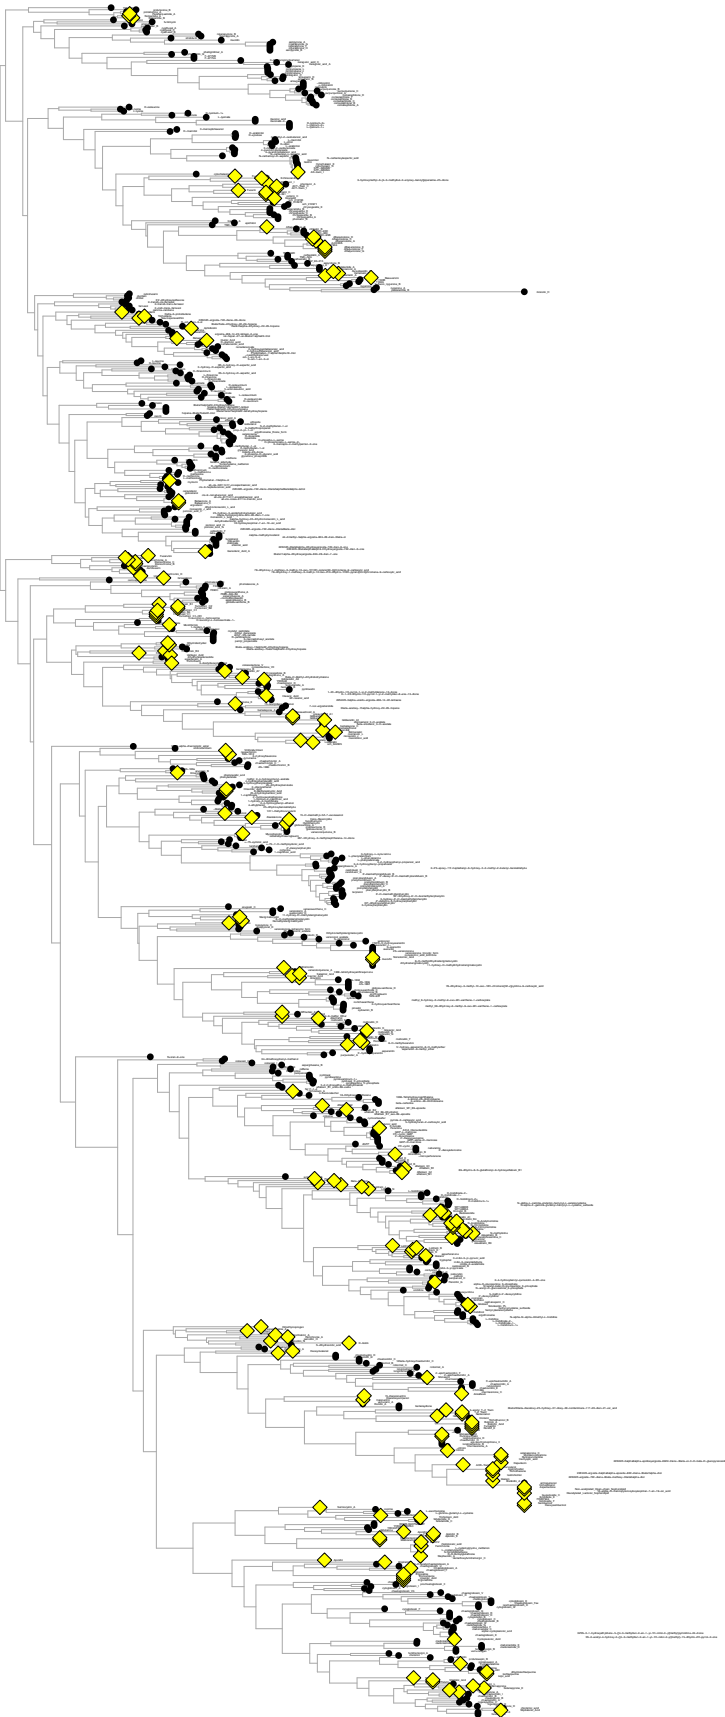

Supplement: NIHMS758788-supplement-5.pdf [file NIHMS758788-supplement-5.pdf]

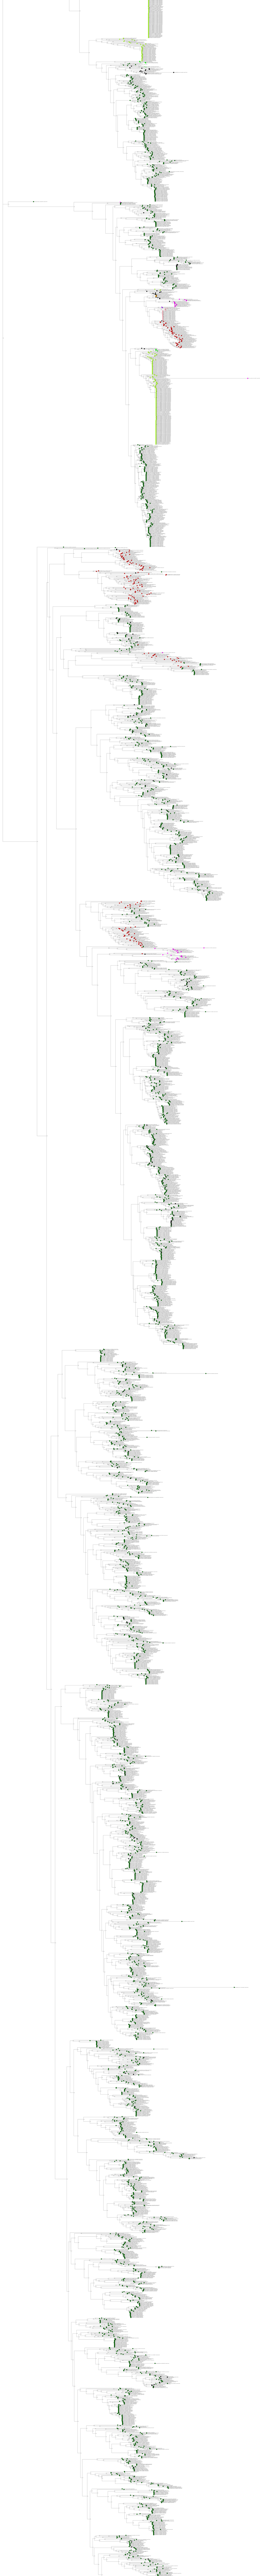

Supplement: NIHMS758788-supplement-6.pdf [file NIHMS758788-supplement-6.pdf]
